# Supplementary material for: Firearm Violence Following the Implementation of California’s Gun Violence Restraining Order Law
Source: PubMed Central journal article supplement (PMC8984773; doi:10.1001/jamanetworkopen.2022.4216), 2022-04-05
Supplement: jamanetwopen-e224216-s001.pdf [file jamanetwopen-e224216-s001.pdf]

## Supplemental Online Content

Pear VA, Wintemute GJ, Jewell NP, Ahern J. Firearm violence following the implementation of California's gun violence restraining order law. *JAMA Netw Open*. 2022;5(4):e224216. doi:10.1001/jamanetworkopen.2022.4216

**eMethods.** Selecting Counties for the Donor Pool, County-Level Variable Details, and Controlled Interrupted Time Series

**eTable 1.** *ICD-9* and *ICD-10* Codes Used to Identify Firearm Violence

**eTable 2.** Donor Pool Weights by Model

**eTable 3.** Synthetic Control Results, Secondary Analyses

**eTable 4.** Synthetic Control Results, Sensitivity Analysis: More Restrictive Donor Pool (n=20)

**eTable 5.** Synthetic Control Results, Sensitivity Analysis: 2018 Intervention

**eTable 6.** Controlled Interrupted Time Series Results, Sensitivity Analysis

**eReferences.**

This supplemental material has been provided by the authors to give readers additional information about their work.

## eMethods

### Selecting Counties for the Donor Pool

Following CDC guidelines for unstable rates,<sup>1</sup> we excluded 26 counties from the donor pool for having, on average, fewer than 20 firearm violence injuries per year in the pre-GVRO period. To ensure we did not include exposed counties in the donor pool, we removed an additional 4 counties with a ratio of GVROs to expected firearm violence injuries > 0.1 (calculated as: total GVRO respondents 2016-2019 / [mean annual firearm violence injuries\*4]). We determined the number of GVRO respondents per county using California Restraining and Protective Order System data, maintained by the California Department of Justice (CA DOJ). The 0.1 cutoff was guided by Swanson and colleagues' finding that 1 firearm suicide was prevented for every 10-20 cases of firearm removal pursuant to a risk-warrant in Connecticut and Indiana.<sup>2,3</sup> Based on this figure, if 10% of the population that went on to harm themselves with a firearm was first served a GVRO, we would expect a 1% reduction in firearm self-harm. We are assuming any lesser measure of association would be undetectable at a population level, such that these counties can be considered unexposed. This left us with 27 control counties in the primary analysis.

### County-Level Predictor Details

County demographic variables came from annual American Community Survey (ACS) population data.<sup>4</sup> Crime rates were estimated with annual publicly available Crimes & Clearances data from CA DOJ<sup>5</sup> and firearm sales were measured with CA DOJ's Dealer Record of Sales data, which contain records of nearly all legal handgun transfers in California. We were missing the last 3 months of DROS data in 2015, so we used the last 3 months of 2014 in its place. Crime and firearm sales were calculated per 1,000 residents. Unemployment data was measured with the ACS 5-year estimates for 2005-2009 and 2010-2014.<sup>6</sup> Urbanicity was measured with the 2013 Rural-Urban Continuum Codes created by the US Department of Agriculture.<sup>7</sup>

In the secondary analysis evaluating biannual overall firearm violence, denominators and predictors were changed to 6-month estimates to the extent possible. County-level biannual population estimates were created by linearly interpolating monthly populations (overall and for subgroups by age, sex, and race/ethnicity) between annual American Community Survey (ACS) estimates<sup>4</sup> and averaging the first and last 6 months of each year. ACS data for 2020 were not available, so interpolation could not be done for 2019; we therefore used the annual estimate for both biannual periods. These biannual population estimates were used as denominators and to characterize the demographic variables of interests.

### Controlled Interrupted Time Series

As an additional sensitivity analysis and to test for a change in slope after GVROs were implemented, we evaluated changes in firearm assault and self-harm in San Diego relative to its synthetic control with controlled interrupted time series analyses. These took the following form:

$$Y_t = \beta_0 + \beta_1 T + \beta_2 X_t + \beta_3 T X_t + \beta_4 G + \beta_5 G T + \beta_6 G X_t + \beta_7 G X_t T$$

$Y_t$  is the firearm assault or self-harm rate at time  $t$ ;  $T$  is a linear time trend;  $X$  is a dummy variable for the intervention, pre- or post-GVRO implementation; and  $G$  is a dummy variable for the treated (San Diego) and control group (synthetic San Diego). The coefficients of interest are  $\beta_6$  and  $\beta_7$ . The former provides the estimated difference in the level change post-GVROs between San Diego and synthetic San Diego, and the latter provides the estimate difference in the change in slope between the two groups after the GVRO law went into effect. We used Newey-West confidence intervals to account for autocorrelation.<sup>8</sup>

eTable 1. *ICD-9* and *ICD-10* Codes Used to Identify Firearm Violence<sup>a</sup>

| Description                                    | Injury Data                   |                                  | Mortality Data |
|------------------------------------------------|-------------------------------|----------------------------------|----------------|
|                                                | ICD-9 Code<br>(1/2005-9/2015) | ICD-10 Code<br>(10/2015-12/2019) | ICD-10 Code    |
| <i>Homicide &amp; assault by:</i>              |                               |                                  |                |
| Handgun                                        | E965.0                        | X93                              | X93            |
| Shotgun                                        | E965.1                        | X94                              | X94            |
| Hunting rifle                                  | E965.2                        | X94                              | X94            |
| Military firearms                              | E965.3                        | X94                              | X94            |
| Other and unspecified firearm                  | E965.4                        | X95.8, X95.9                     | X95            |
| <i>Suicide &amp; self-inflicted injury by:</i> |                               |                                  |                |
| Handgun                                        | E955.0                        | X72                              | X72            |
| Shotgun                                        | E955.1                        | X73                              | X73            |
| Hunting rifle                                  | E955.2                        | X73                              | X73            |
| Military firearms                              | E955.3                        | X73                              | X73            |
| Other and unspecified firearm                  | E955.4                        | X74                              | X74            |

a. ICD = International Classification of Diseases

eTable 2. Donor Pool Weights by Model

| Donor County    | Model Outcome          |                          |
|-----------------|------------------------|--------------------------|
|                 | Annual Firearm Assault | Annual Firearm Self-Harm |
| El Dorado       | 0.163                  | 0                        |
| Los Angeles     | 0.162                  | 0                        |
| Placer          | 0.001                  | 0.061                    |
| San Francisco   | 0.008                  | 0                        |
| San Luis Obispo | 0.259                  | 0.100                    |
| Shasta          | 0.021                  | 0                        |
| Sonoma          | 0.386                  | 0                        |
| Alameda         | 0                      | 0.148                    |
| Kings           | 0                      | 0.026                    |
| Orange          | 0                      | 0.160                    |
| Sacramento      | 0                      | 0.002                    |
| San Bernardino  | 0                      | 0.186                    |
| Ventura         | 0                      | 0.318                    |
| Butte           | 0                      | 0                        |
| Contra Costa    | 0                      | 0                        |
| Fresno          | 0                      | 0                        |
| Humboldt        | 0                      | 0                        |
| Kern            | 0                      | 0                        |
| Madera          | 0                      | 0                        |
| Merced          | 0                      | 0                        |
| Monterey        | 0                      | 0                        |
| Riverside       | 0                      | 0                        |
| San Joaquin     | 0                      | 0                        |
| San Mateo       | 0                      | 0                        |
| Solano          | 0                      | 0                        |
| Stanislaus      | 0                      | 0                        |
| Tulare          | 0                      | 0                        |

eTable 3. Synthetic Control Results, Secondary Analyses

|                                   |                                                       | Outcome <sup>a</sup>            |                                                        |                                           |                                             |
|-----------------------------------|-------------------------------------------------------|---------------------------------|--------------------------------------------------------|-------------------------------------------|---------------------------------------------|
|                                   |                                                       | Biannual<br>Firearm<br>Violence | Annual<br>Firearm<br>Assault,<br>Black and<br>Hispanic | Annual<br>Firearm<br>Assault, NH<br>White | Annual<br>Firearm<br>Self-Harm,<br>NH White |
| <b>San Diego</b>                  | <b>Rate in post-intervention period (per 100,000)</b> | 5.05                            | 8.85                                                   | 2.05                                      | 8.67                                        |
| <b>Synthetic San Diego</b>        | <b>Rate in post-intervention period (per 100,000)</b> | 5.11                            | 12.22                                                  | 2.70                                      | 9.08                                        |
| <b>Rate difference</b>            |                                                       | -0.06                           | -3.37                                                  | -0.66                                     | -0.41                                       |
| <b>Percent difference</b>         |                                                       | -1%                             | -28%                                                   | -24%                                      | -5%                                         |
| <b>Pseudo P-value<sup>b</sup></b> |                                                       | 12/23=0.52                      | 6/25=0.24                                              | 5/18=0.28                                 | 5/16=0.31                                   |
| <b>Model fit (MSPE)</b>           |                                                       | 0.42                            | 4.51                                                   | 0.12                                      | 0.13                                        |

a. NH=Non-Hispanic

b. The proportion of counties (donor pool plus San Diego) with a difference between the observed rate and the synthetic control rate in the post-treatment period equal to or more negative than San Diego's. Counties with a poor pre-period fit (MSPE >20\* San Diego's MSPE) were excluded from the denominator.

eTable 4. Synthetic Control Results, Sensitivity Analysis: More Restrictive Donor Pool (n=20)

|                                   |                                                       | Outcome         |                   |
|-----------------------------------|-------------------------------------------------------|-----------------|-------------------|
|                                   |                                                       | Firearm Assault | Firearm Self-Harm |
| <b>San Diego</b>                  | <b>Rate in post-intervention period (per 100,000)</b> | 4.87            | 5.23              |
| <b>Synthetic San Diego</b>        | <b>Rate in post-intervention period (per 100,000)</b> | 5.83            | 4.73              |
| <b>Rate difference</b>            |                                                       | -0.96           | 0.51              |
| <b>Percent difference</b>         |                                                       | -16%            | +11%              |
| <b>Pseudo P-value<sup>a</sup></b> |                                                       | 7/18=0.39       | 6/7=0.86          |
| <b>Model fit (MSPE)</b>           |                                                       | 1.10            | 0.03              |

a. The proportion of counties (donor pool plus San Diego) with a difference between the observed rate and the synthetic control rate in the post-treatment period equal to or more negative than San Diego's. Counties with a poor pre-period fit (MSPE >20\* San Diego's MSPE) were exclude from the denominator.

eTable 5. Synthetic Control Results, Sensitivity Analysis: 2018 Intervention

|                                   |                                                       | <b>Outcome</b>         |                          |
|-----------------------------------|-------------------------------------------------------|------------------------|--------------------------|
|                                   |                                                       | <b>Firearm Assault</b> | <b>Firearm Self-Harm</b> |
| <b>San Diego</b>                  | <b>Rate in post-intervention period (per 100,000)</b> | 4.72                   | 5.43                     |
| <b>Synthetic San Diego</b>        | <b>Rate in post-intervention period (per 100,000)</b> | 5.53                   | 5.61                     |
| <b>Rate difference</b>            |                                                       | -0.81                  | -0.19                    |
| <b>Percent difference</b>         |                                                       | -15%                   | -3%                      |
| <b>Pseudo P-value<sup>a</sup></b> |                                                       | 11/23=0.48             | 8/20=0.40                |
| <b>Model fit (MSPE pre-GVRO)</b>  |                                                       | 0.62                   | 0.06                     |

a. The proportion of counties (donor pool plus San Diego) with a difference between the observed rate and the synthetic control rate in the post-treatment period equal to or more negative than San Diego's. Counties with a poor pre-period fit (MSPE >20\* San Diego's MSPE) were exclude from the denominator.



eTable 6: Controlled Interrupted Time Series Results, Sensitivity Analysis

|                                                               | <b>Annual Firearm Assault</b> | <b>Annual Firearm Self-Harm</b> |
|---------------------------------------------------------------|-------------------------------|---------------------------------|
| Level change difference post-GVRO implementation <sup>a</sup> | 3.32 (-1.02, 7.67)            | -1.06 (-3.02, 0.90)             |
| Slope change difference post-GVRO implementation <sup>a</sup> | -0.23 (-0.71, 0.25)           | 0.10 (-0.09, 0.29)              |

a. Difference is between San Diego and synthetic San Diego.

## REFERENCES

1. Annotation and suppression of unstable rates. Centers for Disease Control and Prevention, National Center for Injury Prevention and Control. 2018. Accessed December 1, 2019. [www.cdc.gov/injury/wisqars/mapping\\_help/unstable\\_rates.html](http://www.cdc.gov/injury/wisqars/mapping_help/unstable_rates.html)
2. Swanson JW, Easter MM, Alanis-Hirsch K, et al. Criminal justice and suicide outcomes with Indiana's risk-based gun seizure law. *J Am Acad Psychiatry Law*. 2019;47(2):188-197. doi:10.29158/JAAPL.003835-19
3. Swanson JW, Norko MA, Lin H, et al. Implementation and effectiveness of Connecticut's risk-based gun removal law: Does it prevent suicides? *Law Contemp Probl*. 2017;80(2):179-208.
4. ACS 2005-2019 (1-year estimates). US Census Bureau, Social Explorer. 2021. [www.socialexplorer.com](http://www.socialexplorer.com)
5. Crimes & clearances. California Department of Justice. Accessed February 10, 2020. <https://openjustice.doj.ca.gov/exploration/crime-statistics/crimes-clearances>
6. ACS 2009 & 2014 (5-year estimates). US Census Bureau, Social Explorer. [www.socialexplorer.com](http://www.socialexplorer.com)
7. Rural-urban continuum codes: Documentation. United States Department of Agriculture. 2020. Accessed July 14, 2021. [www.ers.usda.gov/data-products/rural-urban-continuum-codes/documentation/](http://www.ers.usda.gov/data-products/rural-urban-continuum-codes/documentation/)
8. Bottomley C, Scott JAG, Isham V. Analysing interrupted time series with a control. *Epidemiologic Methods*. 2019;8(1). doi:doi:10.1515/em-2018-0010
